# Supplementary material for: Episodic, transient systemic acidosis delays evolution of the malignant phenotype: Possible mechanism for cancer prevention by increased physical activity
Source: Springer Nature journal article supplement (doi:10.1186/1745-6150-5-22), 2010-01-01

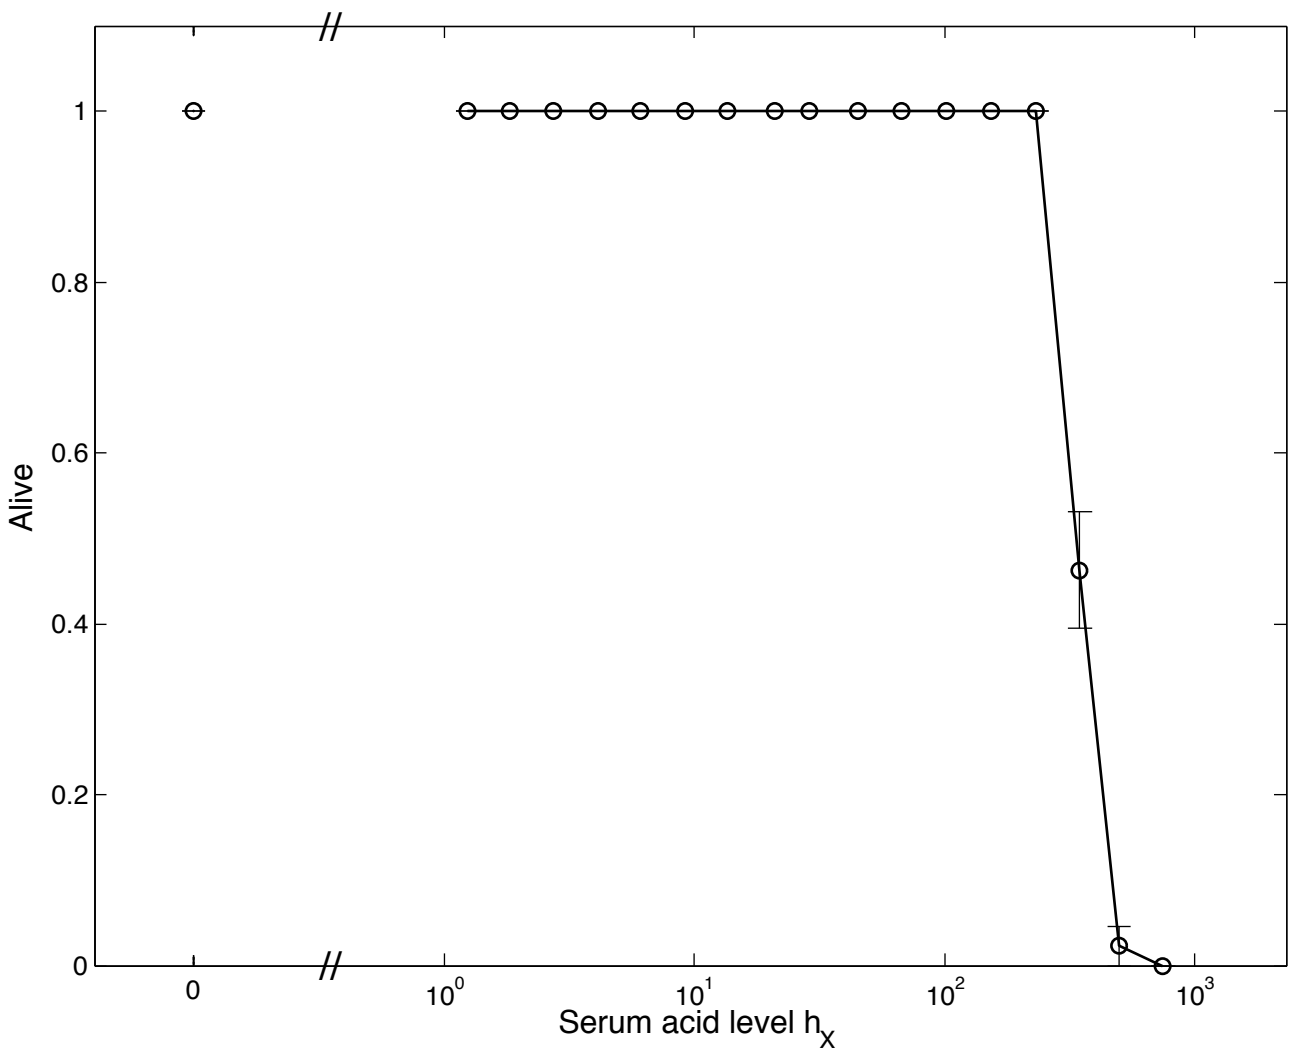

Supplement: 13062_2010_205_MOESM6_ESM.pdf [file 13062_2010_205_MOESM6_ESM.pdf]
